# Supplementary material
Source: publisher figshare collection journal article supplement (https://acs.figshare.com/ndownloader/files/8535631)
Supplement: Supplementary file 1 [file 8535631]

## Supporting Information

### **Controllable Growth of Ga Film Electrodeposited from Aqueous Solution and Cu(In,Ga)Se<sub>2</sub> Solar Cells**

Jinlian Bi, Jianping Ao\*, Qing Gao, Zhaojing Zhang, Guozhong Sun, Qing He, Zhiqiang Zhou, Yun Sun and Yi Zhang\*

College of Electronic Information and Optical Engineering and Tianjin Key Laboratory of Photoelectronic Thin Film Devices and Technology, Nankai University, Tianjin 300071, China

\*Corresponding Authors: E-mail: [aojp@nankai.edu.cn](mailto:aojp@nankai.edu.cn) (J. P. Ao), [yizhang@nankai.edu.cn](mailto:yizhang@nankai.edu.cn) (Y. Zhang)

[Tel: +86-22-23508572](tel:+86-22-23508572)

[Fax: +86-22-23508912](tel:+86-22-23508912)

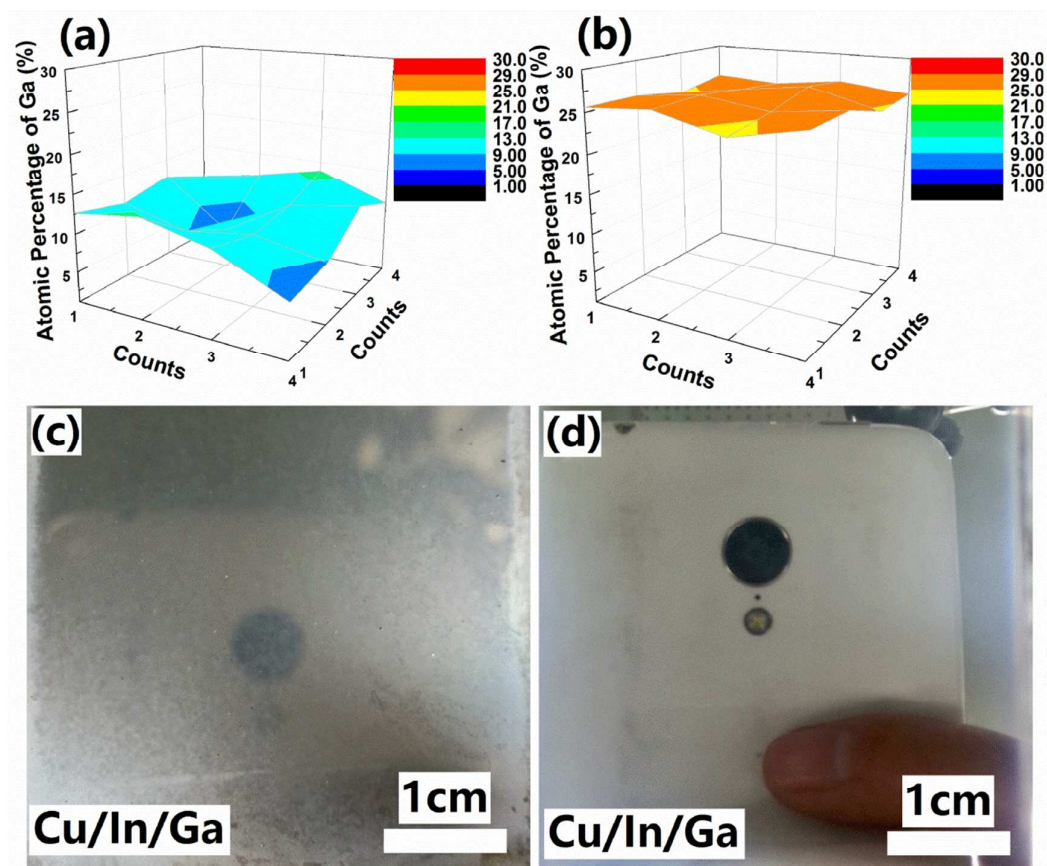

**Figure S1** Ga content in (a) (DC-Cu/In)-(DC-Ga) and (b) (PC-Cu/In)-(PC-Ga) samples measured by EDS along the radial direction of the Cu/In/Ga films and photos of Cu/In/Ga precursors of (c) (DC-Cu/In)-(DC-Ga) and (d) (PC-Cu/In)-(PC-Ga) samples

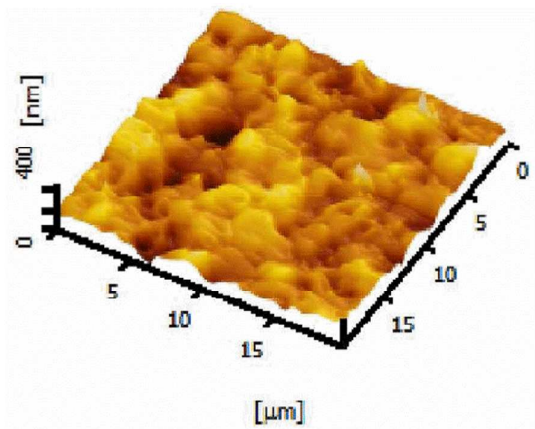

**Figure S2** AFM morphological image of the Ga film on Cu/In layer deposited by DCE method with direct current density  $125 \text{ mA cm}^{-2}$  and with a scanning area of  $20 \mu\text{m} \times 20 \mu\text{m}$  in size. Cu/(In+Ga) and Ga/(In+Ga) ratios of the film are 0.8 and 0.3 measured by XRF

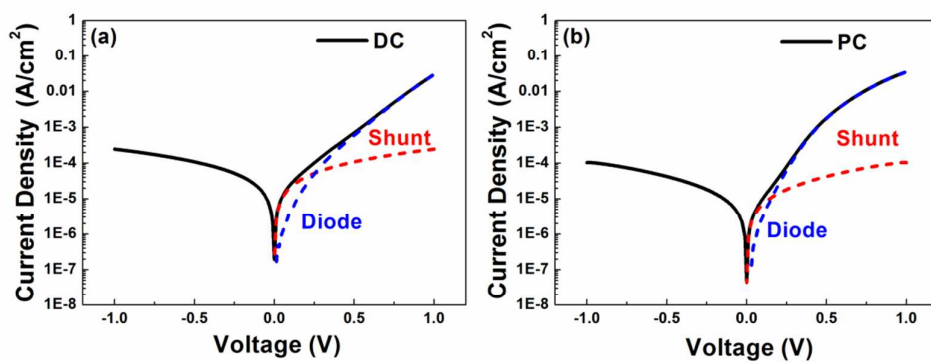

**Figure S3** Shunt and diode current of dark J-V curves of (a) CIGSe-DC and (b) CIGSe-PC samples.
